# Supplementary material for: Identification of a novel recombinant polerovirus and other emergent viruses and tombusvirus-like associated RNA species associated with carrot motley dwarf disease in the United States
Source: PubMed Central journal article supplement (PMC11314183; doi:10.3389/fmicb.2024.1430445), 2024-07-26
Supplement: Data_Sheet_1.pdf [file Data_Sheet_1.pdf]

**Table S1:** List of primers used in this study, along with the annealing temperatures, expected product sizes, and relevant citations.

|                            | Primer name              | Sequence                                | Annealing                 | Product | References              |
|----------------------------|--------------------------|-----------------------------------------|---------------------------|---------|-------------------------|
| Diagnostics                | AR3F                     | CAGATGAATTTCTGGCGTGCTA                  | 56                        | 650 bp  | Campbell et al., 2020   |
|                            | AR5R                     | TCCACCATCAACACYTGRTCRTCTCCRTCRTT*       |                           |         |                         |
|                            | Umbra-NNS                | TGGWGTICACAACAACCTC*                    | 48                        | 408 bp  | Vercruyse et al., 2000  |
|                            | Umbra-IBS                | AAGGCTTTGTACAACATTGG                    |                           |         |                         |
|                            | CtRLV-1                  | GAGGTGAGAAATCGCYTGAC                    | 59                        | 211 bp  |                         |
|                            | CtRLV-2                  | MGGCGCCACARTGATAGG*                     |                           |         |                         |
|                            | PolGen RT3               | ACCTCGACTTTDA*                          | *For RT: 45               | 593 bp  | Lotos et al., 2014      |
|                            | PolGenUp2                | GATGARGGTTCGYTACCG*                     | 58, 54, 52<br>(ramp down) |         |                         |
|                            | PolGenDown2              | ACCTCGACTTTTRAARCC*                     |                           |         |                         |
| RNAseq validation          | CtRLV_F                  | ATACACCACGTGCTTGCT                      | 50                        | ~5.4 kb | Designed for this study |
|                            | CtRLV_R2                 | GGAAGTAGTTGTGCTGCCGCTTAGC               |                           |         |                         |
|                            | TorCLV_F                 | CGAGGAAGATATATGCAGCTTGAG                | 52                        | ~4.6 kb |                         |
|                            | TorCLV_R2                | CTGCCCACTGGCTTAATGAGG                   |                           |         |                         |
|                            | FvPV_F2                  | CGGGCATAAAGATCATATTTTCAGCTTGC           | 55                        | ~4.3 kb |                         |
|                            | FvPV_R2                  | GCTCCCCATTCTATCTTTTTATCAGTATAACCTCC     |                           |         |                         |
|                            | PaPV1_F                  | AGGCACTTCTCTGTGGGAGC                    | 55                        | ~4.6 kb |                         |
|                            | PaPV1_R                  | TGTTGGAACCGGCGTTTTCC                    |                           |         |                         |
|                            | CMoV_F                   | AGCACTTAGATTCCCAGTTTAGC                 | 51                        | ~4.1 kb |                         |
|                            | CMoV_R                   | TTGAGGCGGGCTTTTACTGT                    |                           |         |                         |
|                            | CMoMV_F                  | ATGTGTGCATGGTACGAGGG                    | 53                        | ~3.9 kb |                         |
|                            | CMoMV_R                  | CTTGGGCTGTTACTCCTCAACC                  |                           |         |                         |
|                            | PasUV1_F                 | TGTCCACCGCTCTCTCCAC                     | 53                        | ~3.9 kb |                         |
|                            | PasUV1_R                 | CCTGCAGCTCAGTTGGAT                      |                           |         |                         |
|                            | WCMoV_F                  | TTGGTACTCTGTAACGCGG                     | 53                        | ~3.9 kb |                         |
|                            | WCMoV_R                  | AGACCTTGTTTTAAGGACAAGGATCC              |                           |         |                         |
|                            | Sigma_F                  | TTAGCAACCGCGGGAAAAATTTCC                | 55                        | ~2.8 kb |                         |
|                            | Sigma_R                  | TCCGAAAGGATATGTTGGCTAGTCAG              |                           |         |                         |
|                            | ALVEaRNA_F               | ACCATCATAGCCAGCATTCTGTTG                | 55                        | ~2.3 kb |                         |
|                            | ALVEaRNA_R               | GCGCATTATGGACACGTTGC                    |                           |         |                         |
| GenaRNA_F                  | CCGAAAGGATAAGTTGCCACACGA | 55                                      | ~2.8 kb                   |         |                         |
| GenaRNA_R                  | GTCGCTAGTGGAACCCAGC      |                                         |                           |         |                         |
| RACE adapter primers       | 5' Anchor adaptor        | GGCCACGCGTCTGACTAGTACGGGIIIGGGIIIG*     | 55                        | ~500 bp |                         |
|                            | Abridged adaptor         | GGCCACGCGTCTGACTAGTAC                   |                           |         |                         |
|                            | 3' Anchor adaptor        | GGCCACGCGTCTGACTAGTACTTTTTTTTTTTTTTTTTT |                           |         |                         |
| RACE gene specific primers | 5'PaPV_GSP-R1            | CAAGTATCCAAAGGGATTGCTCGG                | 55                        | ~500 bp |                         |
|                            | 5'PaPV_GSP-R2            | TCAGAGCGCTCAAGGGTTG                     |                           | ~400 bp |                         |
|                            | 3'PaPV_GSP-F1            | CTTTCTCACAGGTCCTCTGTACAG                |                           | ~500 bp |                         |
|                            | 3'PaPV_GSP-F2            | ACAGTTATTCTAGACGAGCATCTGG               |                           | ~400 bp |                         |

|  |                |                             |  |         |  |
|--|----------------|-----------------------------|--|---------|--|
|  | 5'Foen_GSP-R1  | CTGAGCAAGGTTAAGAACGCAG      |  | ~500 bp |  |
|  | 5'Foen_GSP-R2  | AGCTTGAACGTCATCAGCACCA      |  | ~400 bp |  |
|  | Foen_3'RACE_F1 | CTATAGATGAGGTGCAGGCGCAG     |  | ~500 bp |  |
|  | Foen_3'RACE_F2 | CGGATGATATGGATATTCCTGATTCTC |  | ~400 bp |  |

\* I (inosine) base pairs with A, C, and T nucleotides; D pairs with G, A, and T nucleotides; M pairs with A and C nucleotides; R base pairs with A and G nucleotides; W pairs with A and T nucleotides; Y pairs with C and T nucleotides.

**Table S2:** Listed are details about the cloned sequences submitted for nanopore sequencing to validate the results obtained by RNAseq, including the number of cloned sequences, the sequence lengths, and the names and percent shared sequence identity with reference isolates.

| Host     | Viruses     | No. plasmids sequenced | length (nt) | % identity with reference isolate(s) | Reference isolate(s)           | Reference accession(s) |                            |
|----------|-------------|------------------------|-------------|--------------------------------------|--------------------------------|------------------------|----------------------------|
| Carrot   | Polerovirus | CtRLV                  | 1           | 5414                                 | 98.65                          | CtRLV                  | LC434061.1                 |
| Parsley  |             | TorCLV                 | 3           | 3075 - 4620                          | 94.22 - 96.42                  | TorCLV                 | LT615235.1                 |
| Cilantro |             | FvPV                   | 3           | 4320 - 4322                          | 94.84                          | FvPV                   | BK059375.1                 |
| Parsley  |             | PaPV                   | 3           | 4629 - 4661                          | 89.28 - 89.38<br>87.02 - 87.33 | CaPV1<br>TorCLV        | OP886450.1<br>LT615235.1   |
| Carrot   | Umbravirus  | CMoV                   | 1           | 4068                                 | 97.98                          | CMoV                   | KF533714.1                 |
| Carrot   |             | CMoMV                  | 2           | 3906 - 3910                          | 96.75 - 97.34                  | CMoMV                  | OQ993362.1                 |
| Parsley  |             | CMoMV                  | 2           | 3910                                 | 96.98 - 97.01                  | CMoMV                  | OQ993362.1                 |
| Carrot   |             | WCMoV                  | 3           | 3902 - 3905                          | 83.61 - 83.89                  | WCMoV                  | LT615232.1                 |
| Parsley  |             | WCMoV                  | 1           | 4102                                 | 81.42                          | WCMoV                  | LT615232.1                 |
| Parsley  |             | PasUV1                 | 3           | 3942 - 3946                          | 81.99 - 82.2                   | PasUV1                 | OL472237.1                 |
| Carrot   | tlaRNA      | CtRLVaRNA a25          | 1           | 2773                                 | 96.83 - 97.19                  | CtRLVaRNA a25          | KM486095.1;<br>NC_003871.1 |
| Cilantro |             | CtRLVaRNA a25          | 3           | 2772 - 2774                          | 97.30 - 97.37                  | CtRLVaRNA a25          | NC_003871.1                |
| Carrot   |             | CtRLVaRNA alpha        | 2           | 2773 - 2774                          | 96.76 - 96.83                  | CtRLVaRNA alpha        | KM486095.1                 |
| Parsley  |             | CtRLVaRNA sigma        | 1           | 2751                                 | 99.05                          | CtRLVaRNA sigma        | KM486093.1                 |
| Carrot   |             | ALVEaRNA               | 3           | 2266 - 2268                          | 92.56 - 92.65                  | ALVEaRNA               | ON603911.1                 |
| Parsley  |             | ALVEaRNA               | 3           | 2266 - 2268                          | 92.47 - 92.56                  | ALVEaRNA               | ON603911.1                 |

**Table S3:** Nucleotide or amino acid sequences and substitution models used for phylogenetic tree construction using MEGA11 software

| <b>Virus genus</b>        | <b>Nucleotide (nt) or amino acid (aa) sequence used in the analysis</b> | <b>No. of positions in final alignment</b> | <b>Substitution model used</b> | <b>Figure in paper</b> |
|---------------------------|-------------------------------------------------------------------------|--------------------------------------------|--------------------------------|------------------------|
| <b><i>Polerovirus</i></b> | P1-P2; RdRp (aa)                                                        | 985                                        | JTT+G+I                        | 4a                     |
|                           | P3; CP (aa)                                                             | 196                                        | WAG + G                        | 4c                     |
| <b><i>Umbravirus</i></b>  | Genome (nt)                                                             | 3520                                       | GTR+G                          | 6a                     |
| <b>tlaRNAs</b>            | P1a-P1b; RdRp (aa)                                                      | 453                                        | JTT+G                          | 7a                     |

**Table S4:** Analysis methods and associated average P-values for recombination analysis of PaPV sequences using RDP4 software

| <b>Method</b> | <b>Average P-value</b>   |
|---------------|--------------------------|
| RDP           | $2.259 \times 10^{-134}$ |
| GENECONV      | $9.866 \times 10^{-135}$ |
| BootScan      | $8.028 \times 10^{-133}$ |
| MaxChi        | $2.199 \times 10^{-56}$  |
| Chimaera      | $5.429 \times 10^{-58}$  |
| SiScan        | $1.204 \times 10^{-74}$  |
| 3Seq          | $4.440 \times 10^{-16}$  |
| LARD          | $8.567 \times 10^{-254}$ |

**Table S5:** Putative mycovirus and oomycete virus sequences identified by BLASTx and BLASTn analysis of RNAseq data

| Family                  | Genus                                     | Species                                                     | Contigs |
|-------------------------|-------------------------------------------|-------------------------------------------------------------|---------|
| <i>Amalgaviridae</i>    | Unclassified                              | <i>Plasmopara viticola</i> lesion assoc. amalga like virus  | 2       |
| <i>Botourmiaviridae</i> | <i>Botourmiavirus</i>                     | <i>Pestalotiopsis</i> botourmiavirus                        | 1       |
|                         | <i>Magoulivirus</i>                       | <i>Botrytis cinerea</i> ourmia-like virus                   | 3       |
|                         |                                           | <i>Acremonium sclerotigenum</i> ourmia-like virus           | 1       |
|                         |                                           | <i>Cladosporium cladosporioides</i> ourmia-like virus       | 1       |
|                         | <i>Penoulivirus</i>                       | <i>Plasmopara viticola</i> lesion assoc. ourmia-like virus  | 40      |
|                         | <i>Scleroulivirus</i>                     | soybean leaf-assoc. ourmiavirus                             | 4       |
|                         | Unclassified                              | <i>Erysiphe necator</i> assoc. ourmia-like virus            | 56      |
| <i>Discoviridae</i>     | <i>Orthodiscovirus</i>                    | <i>Plasmopara viticola</i> lesion assoc. mycobunyavirales-  | 1       |
| <i>Fusariviridae</i>    | <i>Fusarivirus</i>                        | <i>Erysiphe necator</i> assoc. fusarivirus                  | 4       |
|                         |                                           | <i>Fusarium poae</i> fusarivirus                            | 1       |
|                         | Unclassified                              | <i>Pleospora typhicola</i> fusarivirus                      | 1       |
| <i>Hypoviridae</i>      | <i>Alphahypovirus</i>                     | <i>Bipolaris oryzae</i> hypovirus                           | 1       |
|                         | <i>Betahypovirus</i>                      | <i>Fusarium oxysporum</i> dianthi hypovirus                 | 1       |
| <i>Mitoviridae</i>      | <i>Duamitovirus</i>                       | <i>Beta vulgaris</i> mitovirus                              | 1       |
|                         | <i>Mitovirus</i>                          | <i>Erysiphe necator</i> assoc. mitovirus                    | 41      |
|                         |                                           | <i>Plasmopara viticola</i> lesion assoc. mitovirus          | 28      |
|                         |                                           | <i>Erysiphe necator</i> mitovirus                           | 21      |
|                         |                                           | pea assoc. mitovirus                                        | 19      |
|                         |                                           | Mitovirus sp.                                               | 4       |
|                         |                                           | Erysiphales assoc. mitovirus                                | 3       |
|                         |                                           | soybean leaf-assoc. mitovirus                               | 3       |
|                         |                                           | <i>Fusarium andiyazi</i> mitovirus                          | 2       |
|                         |                                           | <i>Colletotrichum higginsianum</i> mitovirus                | 1       |
|                         |                                           | <i>Leptosphaeria biglobosa</i> mitovirus                    | 1       |
|                         | <i>Sclerotinia sclerotiorum</i> mitovirus | 1                                                           |         |
|                         | <i>Unuamitovirus</i>                      | <i>Alternaria arborescens</i> mitovirus                     | 6       |
|                         | <i>Ophiostoma</i> mitovirus               | 1                                                           |         |
| <i>Mymonaviridae</i>    | <i>Sclerotimonavirus</i>                  | <i>Sclerotinia sclerotiorum</i> negative-stranded RNA virus | 1       |
| <i>Narnaviridae</i>     | <i>Narnavirus</i>                         | <i>Erysiphe necator</i> assoc. narnavirus                   | 9       |
|                         |                                           | <i>Plasmopara viticola</i> lesion assoc. narnavirus         | 6       |
|                         |                                           | <i>Monilinia</i> narnavirus                                 | 3       |
|                         |                                           | <i>Cladosporium tenuissimum</i> narnavirus                  | 1       |
|                         |                                           | <i>Sclerotinia sclerotiorum</i> narnavirus                  | 1       |
|                         | Unclassified                              | <i>Erysiphales</i> narna-like virus                         | 11      |
| <i>Partitiviridae</i>   | <i>Partitivirus</i>                       | <i>Fusarium solani</i> partitivirus                         | 2       |
|                         |                                           | <i>Picoa juniperi</i> partitivirus                          | 1       |
| <i>Potyviridae</i>      | Unclassified                              | <i>Plasmopara viticola</i> lesion assoc. poty-like virus    | 1       |
| <i>Tombusviridae</i>    | <i>Tombusvirus</i>                        | Erysiphales assoc. tombus-like virus                        | 1       |
|                         |                                           | <i>Erysiphe necator</i> assoc. tombus-like virus            | 1       |
|                         |                                           | <i>Leveillula taurica</i> assoc. tombus-like virus          | 1       |

|                     |                    |                                                            |   |
|---------------------|--------------------|------------------------------------------------------------|---|
| <i>Totiviridae</i>  | <i>Totivirus</i>   | red clover powdery mildew-assoc. totivirus                 | 8 |
|                     |                    | <i>Erysiphe necator</i> assoc. totivirus                   | 2 |
|                     |                    | <i>Xanthophyllomyces dendrorhous</i> virus                 | 2 |
|                     |                    | <i>Puccinia striiformis</i> totivirus                      | 1 |
|                     | Unclassified       | <i>Plasmopara viticola</i> lesion assoc. toti              | 4 |
|                     |                    | Erysiphales assoc. toti-like virus                         | 3 |
|                     |                    | <i>Rhodosporidiobolus odoratus</i> RNA virus               | 2 |
| Unclassified        | Unclassified       | riboviria sp.                                              | 5 |
|                     |                    | <i>Uromyces</i> virus A                                    | 3 |
|                     |                    | <i>Erysiphe necator</i> assoc. virus                       | 2 |
|                     |                    | <i>Erysiphe necator</i> assoc. abispo virus                | 1 |
|                     |                    | <i>Erysiphe necator</i> assoc. negative-stranded RNA virus | 1 |
|                     |                    | <i>Fusarium graminearum</i> dsRNA mycovirus                | 1 |
|                     |                    | <i>Macrophomina phaseolina</i> fusagravirus                | 1 |
|                     |                    | <i>Plasmopara viticola</i> lesion assoc. ambiguivirus      | 1 |
|                     |                    | <i>Sclerotinia sclerotiorum</i> bunyavirus                 | 1 |
| <i>Virgaviridae</i> | <i>Tobamovirus</i> | <i>Plasmopara viticola</i> lesion assoc. tobamo-like virus | 3 |
|                     |                    | <i>Erysiphe necator</i> assoc. tobamo-like virus           | 2 |
|                     | unclassified       | <i>Erysiphe necator</i> assoc. virga-like virus            | 6 |

**Table S6:** Putative arthropod and nematode virus sequences identified by BLASTx and BLASTn analysis of RNAseq data

| Family                  | Genus              | Species                                                        | No. of Contigs |
|-------------------------|--------------------|----------------------------------------------------------------|----------------|
| <i>Chuviridae</i>       | Unclassified       | lishi spider Virus                                             | 2              |
| <i>Lispiviridae</i>     | <i>Nematovirus</i> | Wuchang romanomermis nematode virus                            | 2              |
| <i>Mitoviridae</i>      | <i>Mitovirus</i>   | <i>Thrips tabaci</i> associated mitovirus                      | 3              |
| <i>Orthomyxoviridae</i> | Unclassified       | hemipteran orthomyxo-related virus                             | 1              |
| <i>Phasmaviridae</i>    |                    | Wuhan insect virus                                             | 5              |
| <i>Phenuiviridae</i>    |                    | hymenopteran phenui-related virus                              | 1              |
| <i>Solemoviridae</i>    |                    | nelson sobemo-like virus                                       | 1              |
|                         |                    | <i>Frankliniella occidentalis</i> associated sobemo-like virus | 1              |
| <i>Tombusviridae</i>    |                    | crane fly tombus-like virus                                    | 1              |
| Unclassified            |                    | brandeis virus                                                 | 4              |
|                         |                    | Hubei levi-like virus                                          | 1              |
|                         |                    | Hubei Wuhan insect virus                                       | 1              |
|                         |                    | muthill virus                                                  | 1              |
|                         |                    | Shahe levi-like virus                                          | 1              |
|                         |                    | barley aphid RNA virus                                         | 4              |
|                         |                    | gorebridge virus                                               | 2              |
|                         |                    | Hubei partiti-like virus                                       | 1              |
| Beihai narna-like virus | 1                  |                                                                |                |
